# Supplementary material
Source: HighWire-hosted journal article supplement (doi:10.1101/rna.079966.124)
Supplement: Supplemental_Material.docx [file Supplemental_Material.docx]

**Supplemental Material**

**Chemical manipulation of m1A mediates its detection in human tRNA**

Kinga Pajdzik1,#, Ruitu Lyu1,#, Xiaoyang Dou1,#, Chang Ye1, Li-Sheng Zhang1,2, Qing Dai1,*, Chuan He*,1,3,4,5

1Department of Chemistry, The University of Chicago, Chicago, IL, USA.

2Division of Life Science, The Hong Kong University of Science and Technology (HKUST), Kowloon, Hong Kong SAR, China.

3Howard Hughes Medical Institute, The University of Chicago, Chicago, IL, USA.

4Department of Biochemistry and Molecular Biology**,** The University of Chicago, Chicago, IL, USA.

5Institute for Biophysical Dynamics, The University of Chicago, Chicago, IL, USA.

#These authors contributed equally.

*Correspondence: [chuanhe@uchicago.edu](mailto:chuanhe@uchicago.edu); [daiqing@uchicago.edu](mailto:daiqing@uchicago.edu)

This file includes:

Supplemental Figures 1 – 3

Supplemental Table 1

Figure S1


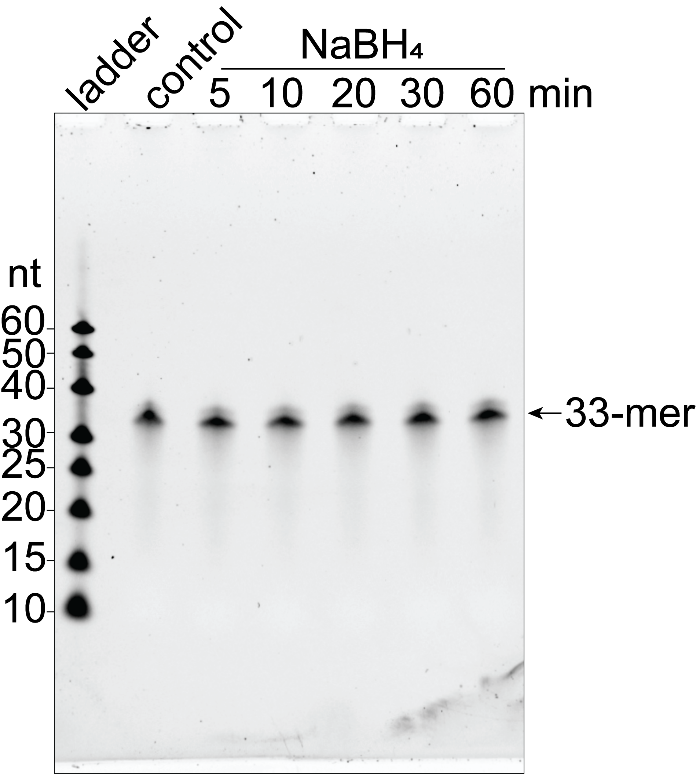


**Supplemental Figure S1.** RNA degradation upon treatment with NaBH4. TBE-UREA gel of 33‑mer RNA oligonucleotide untreated and treated with 0.1M NaBH4 at room temperature for 5, 10, 20, 30 or 60 min.

Figure S2


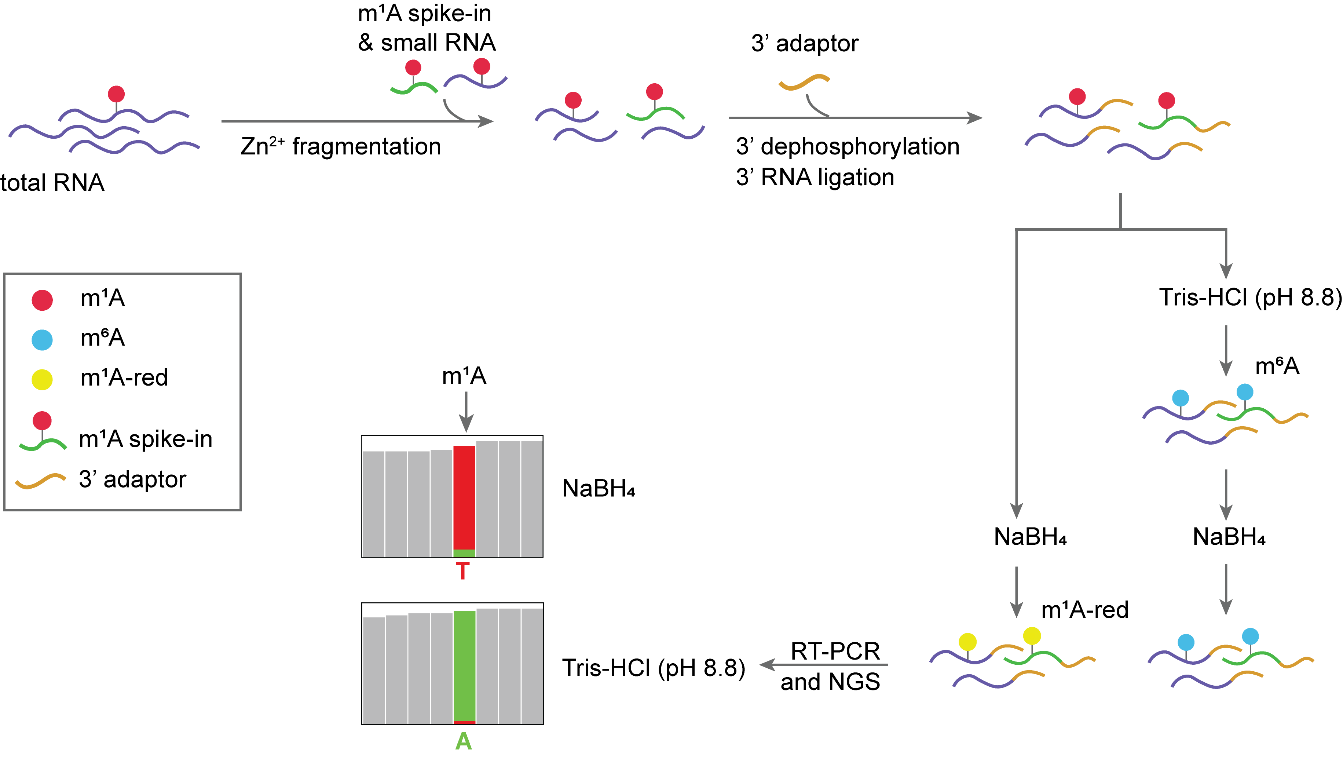


**Supplemental Figure S2.** Library construction outline. Total RNA is fragmented with Zn2+ and spike-in RNA containing m1A is added to fragmented RNA. 3’ ends are dephosphorylated, and RNA is undergone 3’ RNA ligation. After ligation, RNA is split into two halves: one half is treated with NaBH4 to reduce m1A (m1A-red) and another half is treated with Tris-HCl pH 8.8 to convert m1A into m6A and then undergone treatment with NaBH4. After treatment, RNA is undergone reverse transcription and PCR, followed by next-generation sequencing (NGS). M1A site reduced with NaBH­­4 is read as “T”, while m1A converted to m6A under alkaline conditions is read as “A”.

Figure S3

**
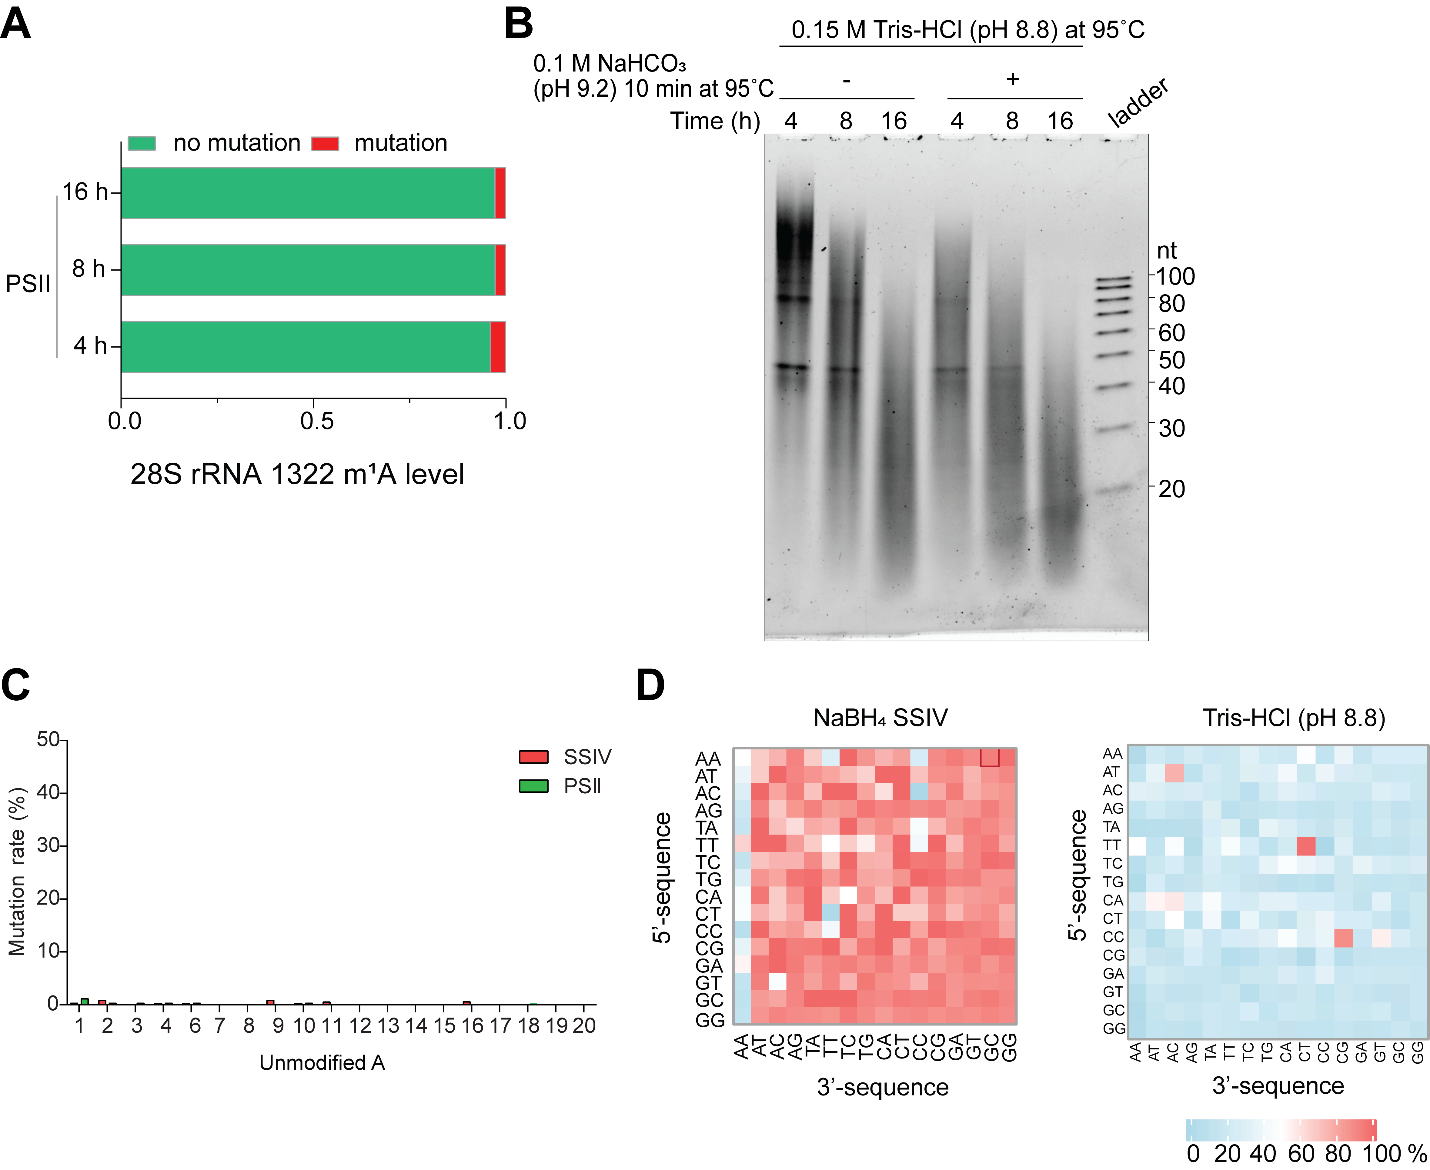
**

**Supplemental Figure S3.** Quality control analysis for red-m1A-seq. (A) Mutation levels at 1322 m1A site in HeLa 28S rRNA in the control libraries treated with 0.15M Tris-HCl (pH 8.8) at 95°C for 4, 8 or 16 hours followed by additional treatment with 0.1M NaHCO3 (pH 9.2) at 95°C for 10 min. (B) TBE-UREA gel of HeLa total RNA mixed with m1A synthetic RNA oligonucleotides treated with 0.15M Tris-HCl (pH 8.8) at 95°C for 4, 8 or 16 hours followed by additional treatment with 0.1M NaHCO3 (pH 9.2) at 95°C for 10 min. (C) Bar plot showing the mutation rate (%) of unmodified adenosines in the Spike-In oligo RNA with a fixed sequence. These libraries underwent NaBH4 reduction and were prepared using SSIV or PS II RT enzymes. (D) The heatmaps showing the mutation rates at the m1A site in the NNm1ANN Spike-In oligos in the reduction libraries built with SSIV RT enzyme (left) and within the control (Tris-treated) libraries built with SSIV RT enzyme. The mutation rates are determined by NGS. Mutation rates in percentage are color coded.

Supplemental Table 1. Oligonucleotide sequences.

| **Oligonucleotide name** | **Sequence (5’ - 3’)** | **Notes** |
| --- | --- | --- |
| 5mer | rArCrm1ArUrG | For MALDI TOF MS |
| 33-mer_15U | rGrGrArGrArCrGrGrUrCrGrGrGrUrCrCrArGrArUrArUrUrCrGrUrArUrCrUrGrUrC | For RT-PCR-IVT |
| 33mer_15A | rGrGrArGrArCrGrGrUrCrGrGrGrArCrCrArGrArUrArUrUrCrGrUrArUrCrUrGrUrC | For RT-PCR-IVT |
| 33mer_15m1A | rGrGrArGrArCrGrGrUrCrGrGrGrm1ArCrCrArGrArUrArUrUrCrGrUrArUrCrUrGrUrC | - For RT-PCR-IVT  - For RT-PCR-Sanger-seq  - For read-through assay |
| RT-primer /For-01 | GCG GAG CCC ACA CTC TAC TCG ACA GAT ACG AAT AT | - RT primer and PCR forward primer for RT-PCR-IVT  - RT primer for RT-PCR-Sanger-seq |
| FAM-RT-primer | FAM/CGG AGC CCA CACT CTA CTC GAC AGA TAC GAA TAT | For read-through assay |
| Rev-01 | CTAATACGACTCACTATAGGGCGGAGACGGTCGGG | - PCR reverse primer in RT-PCR-IVT  - PCR reverse primer in RT-PCR-Sanger-seq |
| For-02 | TTTGCTGAGGAGTGCCGTTAATTAAGTGCGGAGCCCACACTCT | - PCR forward primer in RT-PCR-Sanger-seq |
| Sanger seq primer | HZ149:  TGCTGAGGAGTGCCGT | For Sanger seq |
| 43mer_m1A | /Phos/rCrCrUrArCrCrUrCrCrCrUrCrArCrCrArArm1ArGrCrCrCrArUrArArArArArU rArArArArArArUrUrArUrArArC | Spike-in for NGS library |
| 45mer_m1A | /Phos/rGrUrArArUrUrArUrArCrNrNrm1ArNrNrArUrUrCrGrUrUrGrU rArCrGrUrGrArUrGrCrCrUrArArUrGrCrCrUrGrArA | Spike-in for NGS library |
| 3’ RNA adaptor | rApp-NN NNN ATC ACG AG ATC GGA AGA GCA CAC GTC T/3BioTEG/ | For NGS library preparation |
| 3’ cDNA adaptor | /Phos/NNN NNG ATC GTC GGA CTG TAG AAC TCT GAA C/3SpC3 | For NGS library preparation |
| SR RT primer | AGA CGT GTG CTC TTC CGA TCT | For NGS library preparation |
