# Supplementary material
Source: HighWire-hosted journal article supplement (doi:10.1101/rna.079966.124)
Supplement: Supplemental_Table_2.xlsx [file Supplemental_Table_2.xlsx]

## Sheet:  m1A58 on human tRNA
Human tRNA species	position	Reference	NaBH4_PSII_rep1	NaBH4_PSII_rep2	NaBH4_PSII_rep3	NaBH4_PSII_std	NaBH4_SSIV_rep1	NaBH4_SSIV_rep2	NaBH4_SSIV_rep3	NaBH4_SSIV_std	4NTP_17h_NaBH4_SSIV_rep1	4NTP_17h_NaBH4_SSIV_rep2	4NTP_17h_NaBH4_SSIV_rep3	4NTP_17h_NaBH4_SSIV_std	Tris8.8_17h_NaBH4_SSIV_rep1	Tris8.8_17h_NaBH4_SSIV_rep2	Tris8.8_17h_NaBH4_SSIV_rep3	Tris8.8_17h_NaBH4_SSIV_std
MT tRNA-Leu_UUA	58	A	0.933	0.935	0.922	0.00571548	0.932	0.928	0.919	0.0054365	0.246	0.249	0.242	0.00286744	0.084	0.078	0.134	0.0251042
MT tRNA-Lys_AAA	58	A	0.46	0.438	0.462	0.010873	0.434	0.459	0.457	0.0113431	0.115	0.108	0.109	0.00309121	0.026	0.036	0.028	0.00432049
MT tRNA-Ser_UCN	58	A	0.288	0.282	0.287	0.00262467	0.329	0.335	0.331	0.00249444	0.048	0.058	0.057	0.00449691	0.03	0.013	0.039	0.0107806
tRNA-Ala-AGC	58	A	0.902	0.92	0.934	0.0130979	0.964	0.967	0.938	0.0130213	0.308	0.279	0.241	0.0274348	0.25	0.25	0.167	0.0391266
tRNA-Ala-CGC	58	A	0.928	0.952	0.945	0.0100775	0.924	0.853	0.916	0.0317525	0.22	0.198	0.213	0.00917727	0.25	0.262	0.256	0.00489898
tRNA-Ala-TGC	58	A	0.975	0.933	0.953	0.0171529	0.921	0.912	0.891	0.0125698	0.106	0.198	0.154	0.0375707	0.125	0.111	0.08	0.0188031
tRNA-Arg-ACG	58	A	0.906	0.906	0.913	0.00329983	0.826	0.888	0.877	0.0270103	0.147	0.125	0.153	0.012037	0.086	0.077	0.045	0.0175942
tRNA-Arg-CCG	58	A	0.954	0.953	0.961	0.00355903	0.971	0.965	0.97	0.00262467	0.157	0.166	0.172	0.00616441	0.117	0.186	0.167	0.0291014
tRNA-Arg-CCT	58	A	0.872	0.958	0.945	0.0378506	0.867	0.919	0.88	0.0220958	0.15	0.201	0.164	0.0215149	0.167	0.135	0.229	0.0390214
tRNA-Arg-TCG	58	A	0.903	0.907	0.896	0.00454606	0.857	0.927	0.928	0.0332365	0.155	0.149	0.16	0.00449691	0.07	0.129	0.079	0.0259529
tRNA-Arg-TCT	58	A	0.963	0.952	0.948	0.0063421	0.989	0.98	0.994	0.00579272	0.204	0.198	0.271	0.0330891	0.2	0.156	0.141	0.0250377
tRNA-Asn-GTT	58	A	0.938	0.969	0.938	0.0146135	0.946	0.933	0.955	0.00903081	0.138	0.143	0.175	0.0163911	0.01	0.11	0.156	0.0609481
tRNA-Asp-GTC	58	A	0.306	0.322	0.312	0.00659966	0.238	0.275	0.236	0.017932	0.052	0.043	0.045	0.00385861	0.004	0.016	0.017	0.00590668
tRNA-Cys-GCA	58	A	0.95	0.959	0.952	0.00385861	0.939	0.925	0.943	0.00771722	0.161	0.137	0.161	0.0113137	0.042	0.077	0.06	0.0142906
tRNA-Gln-CTG	58	A	0.939	0.944	0.933	0.00449691	0.896	0.926	0.922	0.0133	0.199	0.223	0.227	0.0123648	0.05	0.086	0.132	0.0335592
tRNA-Gln-TTG	58	A	0.952	0.953	0.904	0.0228668	0.903	0.845	0.935	0.0372499	0.202	0.213	0.24	0.0159652	0.095	0.092	0.108	0.00694422
tRNA-Glu-CTC	58	A	0.469	0.517	0.529	0.025923	0.502	0.476	0.513	0.0155134	0.107	0.127	0.133	0.0111156	0.044	0.08	0.161	0.0489285
tRNA-Glu-TTC	58	A	0.865	0.839	0.861	0.011431	0.768	0.811	0.808	0.0196016	0.138	0.166	0.186	0.0196864	0.05	0.05	0.041	0.00424264
tRNA-Gly-CCC	58	A	0.947	0.931	0.937	0.00659966	0.939	0.93	0.938	0.00402768	0.231	0.25	0.26	0.0120277	0.082	0.131	0.15	0.0286473
tRNA-Gly-GCC	58	A	0.902	0.896	0.898	0.00249444	0.927	0.915	0.9	0.0110454	0.214	0.228	0.237	0.00946338	0.077	0.083	0.111	0.0148174
tRNA-Gly-TCC	58	A	0.918	0.863	0.876	0.023471	0.896	0.885	0.911	0.0106562	0.191	0.196	0.191	0.00235702	0.1	0.16	0.203	0.0422401
tRNA-His-GTG	58	A	0.899	0.865	0.902	0.0167796	0.851	0.863	0.885	0.0140791	0.174	0.15	0.185	0.0146135	0.067	0.095	0.116	0.0200721
tRNA-Ile-AAT	58	A	0.897	0.919	0.921	0.010873	0.864	0.892	0.884	0.0117757	0.103	0.146	0.14	0.0190146	0.111	0.098	0.145	0.0198158
tRNA-Ile-TAT	58	A	0.936	0.966	0.944	0.0126842	0.969	0.956	0.964	0.00535413	0.193	0.243	0.282	0.0364265	0.358	0.311	0.362	0.0231565
tRNA-iMet-CAT	58	A	0.882	0.886	0.88	0.00249444	0.372	0.385	0.395	0.0094163	0.107	0.107	0.123	0.00754247	0.065	0.211	0.05	0.0726193
tRNA-Leu-AAG	58	A	0.942	0.928	0.933	0.00579272	0.924	0.933	0.93	0.00374166	0.224	0.236	0.272	0.0203961	0.079	0.089	0.1	0.00857645
tRNA-Leu-CAA	58	A	0.952	0.957	0.945	0.00492161	0.949	0.966	0.96	0.00703957	0.2	0.211	0.252	0.0223756	0.021	0.05	0.064	0.0179072
tRNA-Leu-CAG	58	A	0.859	0.875	0.874	0.00731817	0.831	0.824	0.828	0.00286744	0.135	0.146	0.17	0.0146135	0.075	0.053	0.078	0.0111455
tRNA-Leu-TAA	58	A	0.894	0.896	0.894	0.000942809	0.912	0.894	0.906	0.00748331	0.155	0.141	0.169	0.011431	0.096	0.086	0.06	0.0151731
tRNA-Leu-TAG	58	A	0.944	0.942	0.947	0.0020548	0.961	0.953	0.97	0.00694422	0.238	0.247	0.272	0.0143836	0.129	0.125	0.176	0.0231565
tRNA-Lys-CTT	58	A	0.963	0.967	0.946	0.00910433	0.945	0.949	0.966	0.00910433	0.209	0.221	0.193	0.0114698	0.333	0.243	0.3	0.0371753
tRNA-Lys-TTT	58	A	0.842	0.911	0.868	0.0284527	0.914	0.907	0.903	0.00454606	0.086	0.11	0.143	0.0233666	0.364	0.35	0.29	0.0320971
tRNA-Met-CAT	58	A	0.952	0.959	0.931	0.0118977	0.978	0.953	0.958	0.0108012	0.15	0.153	0.201	0.0233666	0.222	0.138	0.191	0.0346827
tRNA-Phe-GAA	58	A	0.89	0.871	0.916	0.0184451	0.801	0.873	0.881	0.0359753	0.097	0.076	0.109	0.0136382	0.111	0.185	0.212	0.0426953
tRNA-Pro-AGG	58	A	0.83	0.815	0.881	0.0282489	0.832	0.844	0.854	0.00899383	0.242	0.2	0.294	0.0384477	0.224	0.201	0.219	0.00987702
tRNA-Pro-CGG	58	A	0.83	0.834	0.835	0.00216025	0.939	0.86	0.877	0.0339509	0.261	0.24	0.235	0.0112645	0.143	0.109	0.102	0.0179072
tRNA-Pro-TGG	58	A	0.854	0.81	0.811	0.0205102	0.843	0.871	0.892	0.0200721	0.237	0.206	0.233	0.0137679	0.25	0.246	0.233	0.00725718
tRNA-SeC-TCA	58	A	1	1	0.885	0.0542115	0.833	0.913	0.943	0.046428	0.333	0.265	0.263	0.0325372	0.094	0.05	0.025	0.0285229
tRNA-Ser-AGA	58	A	0.914	0.918	0.913	0.00216025	0.813	0.885	0.918	0.0438406	0.122	0.105	0.182	0.0330286	0.029	0.07	0.05	0.0167398
tRNA-Ser-CGA	58	A	0.965	0.943	0.951	0.00909212	0.935	0.902	0.874	0.024931	0.143	0.167	0.191	0.0195959	0.035	0.017	0.019	0.00805536
tRNA-Ser-GCT	58	A	0.952	0.956	0.954	0.00163299	0.945	0.947	0.943	0.00163299	0.182	0.186	0.178	0.00326599	0.143	0.15	0.177	0.0146591
tRNA-Ser-TGA	58	A	0.955	0.945	0.944	0.00496655	0.933	0.917	0.925	0.00653197	0.164	0.141	0.145	0.0100333	0.095	0.122	0.132	0.0156276
tRNA-Thr-AGT	58	A	0.981	0.981	0.983	0.000942809	0.992	0.991	0.994	0.00124722	0.31	0.303	0.371	0.0305396	0.049	0.049	0.049	6.93889e-18
tRNA-Thr-CGT	58	A	0.964	0.979	0.971	0.00612826	0.979	0.985	0.987	0.00339935	0.31	0.344	0.358	0.020155	0.08	0.07	0.1	0.0124722
tRNA-Thr-TGT	58	A	0.905	0.897	0.941	0.0191369	0.935	0.938	0.92	0.00787401	0.193	0.153	0.173	0.0163299	0.186	0.186	0.186	2.77556e-17
tRNA-Trp-CCA	58	A	0.949	0.957	0.952	0.00329983	0.905	0.922	0.959	0.0225438	0.132	0.192	0.216	0.035327	0.212	0.212	0.212	0
tRNA-Tyr-GTA	58	A	0.955	0.953	0.974	0.00946338	0.953	0.94	0.949	0.0054365	0.142	0.182	0.143	0.018625	0.143	0.143	0.143	0
tRNA-Val-AAC	58	A	0.838	0.74	0.757	0.0427577	0.378	0.407	0.311	0.0402023	0.167	0.148	0.203	0.0228084	0.203	0.203	0.203	2.77556e-17
tRNA-Val-CAC	58	A	0.941	0.929	0.934	0.00492161	0.935	0.938	0.937	0.00124722	0.165	0.176	0.198	0.0137194	0.198	0.198	0.198	2.77556e-17
tRNA-Val-TAC	58	A	0.96	0.929	0.9	0.0244994	0.455	0.5	0.483	0.0185532	0.065	0.122	0.116	0.0255734	0.116	0.116	0.116	0

## Sheet: m1A9 on human tRNA
Human tRNA species	position	Reference	NaBH4_PSII_rep1	NaBH4_PSII_rep2	NaBH4_PSII_rep3	NaBH4_PSII_std	NaBH4_SSIV_rep1	NaBH4_SSIV_rep2	NaBH4_SSIV_rep3	NaBH4_SSIV_std	4NTP_17h_NaBH4_SSIV_rep1	4NTP_17h_NaBH4_SSIV_rep2	4NTP_17h_NaBH4_SSIV_rep3	4NTP_17h_NaBH4_SSIV_std	Tris8.8_17h_NaBH4_SSIV_rep1	Tris8.8_17h_NaBH4_SSIV_rep2	Tris8.8_17h_NaBH4_SSIV_rep3	Tris8.8_17h_NaBH4_SSIV_std
MT tRNA-Glu-TTC	9	A	0.987	0.988	0.987	0.000471405	0.989	0.993	0.991	0.00163299	0.397	0.406	0.465	0.0301588	0.329	0.373	0.327	0.0212289
MT tRNA-Val-TAC	9	A	0.988	0.991	0.988	0.00141421	0.993	0.995	0.994	0.000816497	0.411	0.454	0.456	0.0207579	0.335	0.406	0.349	0.0307065
MT tRNA-Pro-TGG	9	A	0.974	0.98	0.975	0.00262467	0.966	0.968	0.968	0.000942809	0.36	0.418	0.417	0.0271088	0.335	0.388	0.375	0.0225536
MT tRNA-Trp-TCA	9	A	0.971	0.971	0.966	0.00235702	0.986	0.988	0.988	0.000942809	0.323	0.415	0.415	0.0433692	0.342	0.329	0.43	0.0448628
MT tRNA-Thr-TGT	9	A	0.987	0.988	0.985	0.00124722	0.988	0.988	0.983	0.00235702	0.358	0.378	0.394	0.0147271	0.215	0.281	0.218	0.0304302
MT tRNA-Arg-TCG	9	A	0.971	0.983	0.981	0.00524934	0.979	0.991	0.966	0.0102089	0.238	0.421	0.356	0.0757467	0.34	0.3	0.271	0.0282882
MT tRNA-Ala-TGC	9	A	0.987	0.987	0.987	0	0.991	0.993	0.992	0.000816497	0.32	0.349	0.395	0.0308797	0.369	0.389	0.392	0.0102089
MT tRNA-Lys-TTT	9	A	0.991	0.993	0.99	0.00124722	0.991	0.992	0.993	0.000816497	0.463	0.529	0.506	0.0273537	0.342	0.408	0.357	0.0282489
MT tRNA-Gly-TCC	9	A	0.988	0.992	0.988	0.00188562	0.98	0.984	0.98	0.00188562	0.261	0.297	0.27	0.0152971	0.278	0.3	0.236	0.0265497
MT tRNA-His-GTG	9	A	0.992	0.994	0.993	0.000816497	0.988	0.989	0.982	0.00309121	0.306	0.357	0.288	0.0292233	0.417	0.231	0.206	0.0941288
MT tRNA-Phe-AAA	9	A	0.968	0.974	0.975	0.00309121	0.978	0.968	0.971	0.00418994	0.231	0.272	0.244	0.0171075	0.284	0.267	0.3	0.0134743
MT tRNA-Asn-ATT	9	A	0.97	0.973	0.973	0.00141421	0.957	0.962	0.96	0.0020548	0.349	0.374	0.406	0.0233286	0.241	0.225	0.253	0.0114698
MT tRNA-Asp-ATC	9	A	0.936	0.953	0.938	0.00758654	0.88	0.884	0.872	0.00498888	0.213	0.265	0.262	0.0238374	0.236	0.221	0.228	0.00612826
MT tRNA-Leu-TAG	9	A	0.702	0.735	0.712	0.0138163	0.559	0.608	0.571	0.020854	0.343	0.431	0.414	0.0381139	0.267	0.2	0.267	0.0315841
tRNA-Asp-GTC	9	A	0.913	0.956	0.955	0.0200389	0.834	0.843	0.831	0.00509902	0.104	0.121	0.108	0.00725718	0.142	0.091	0.138	0.0231565

## Sheet: m1A on human rRNA
Human rRNA species	position	Reference	NaBH4_PSII_rep1	NaBH4_PSII_rep2	NaBH4_PSII_rep3	NaBH4_PSII_std	NaBH4_SSIV_rep1	NaBH4_SSIV_rep2	NaBH4_SSIV_rep3	NaBH4_SSIV_std	4NTP_17h_NaBH4_SSIV_rep1	4NTP_17h_NaBH4_SSIV_rep2	4NTP_17h_NaBH4_SSIV_rep3	4NTP_17h_NaBH4_SSIV_std	Tris8.8_17h_NaBH4_SSIV_rep1	Tris8.8_17h_NaBH4_SSIV_rep2	Tris8.8_17h_NaBH4_SSIV_rep3	Tris8.8_17h_NaBH4_SSIV_std
5.8S rRNA	17	A	0.093	0.097	0.094	0.00169967	0.062	0.075	0.07	0.00535413	0.012	0.013	0.01	0.00124722	0.026	0.03	0.025	0.00216025
5.8S rRNA	40	A	0.067	0.072	0.072	0.00235702	0.05	0.058	0.059	0.00402768	0.012	0.014	0.012	0.000942809	0.02	0.022	0.013	0.00385861
5.8S rRNA	41	A	0.067	0.068	0.072	0.00216025	0.049	0.053	0.059	0.00410961	0.011	0.011	0.01	0.000471405	0.017	0.018	0.015	0.00124722
28S rRNA	1322	A	0.93	0.93	0.926	0.00188562	0.822	0.835	0.831	0.0054365	0.15	0.151	0.156	0.00262467	0.083	0.097	0.125	0.0174611
28S rRNA	2985	A	0.107	0.113	0.13	0.00974109	0.083	0.095	0.099	0.00679869	0.029	0.037	0.031	0.00339935	0.028	0.023	0.028	0.00235702

## Sheet: m1A sites on other sites
RNA species	position	Reference	NaBH4_PSII_rep1	NaBH4_PSII_rep2	NaBH4_PSII_rep3	NaBH4_PSII_std	NaBH4_SSIV_rep1	NaBH4_SSIV_rep2	NaBH4_SSIV_rep3	NaBH4_SSIV_std	4NTP_17h_NaBH4_SSIV_rep1	4NTP_17h_NaBH4_SSIV_rep2	4NTP_17h_NaBH4_SSIV_rep3		Tris8.8_17h_NaBH4_SSIV_rep1	Tris8.8_17h_NaBH4_SSIV_rep2	Tris8.8_17h_NaBH4_SSIV_rep3	Tris8.8_17h_NaBH4_SSIV_std
MT tRNA-Arg-TCG	16	A	0.351	0.43	0.359	0.0355059	0.327	0.41	0.308	0.0442895	0.045	0.064	0.055	0.0077603	0.125	0.105	0.04	0.0362859
MT tRNA-Asn-ATT	72	A	0.056	0.057	0.052	0.00216025	0.074	0.077	0.057	0.00880656	0.005	0.007	0.008	0.00124722	0	0	0	0
